# Supplementary material
Source: Springer Nature journal article supplement (https://www.springermedizin.de/resource/supplementary/12936_2013_3177_MOESM4_ESM.pdf/9545236)
Supplement: MOESM4 [file 9545236]

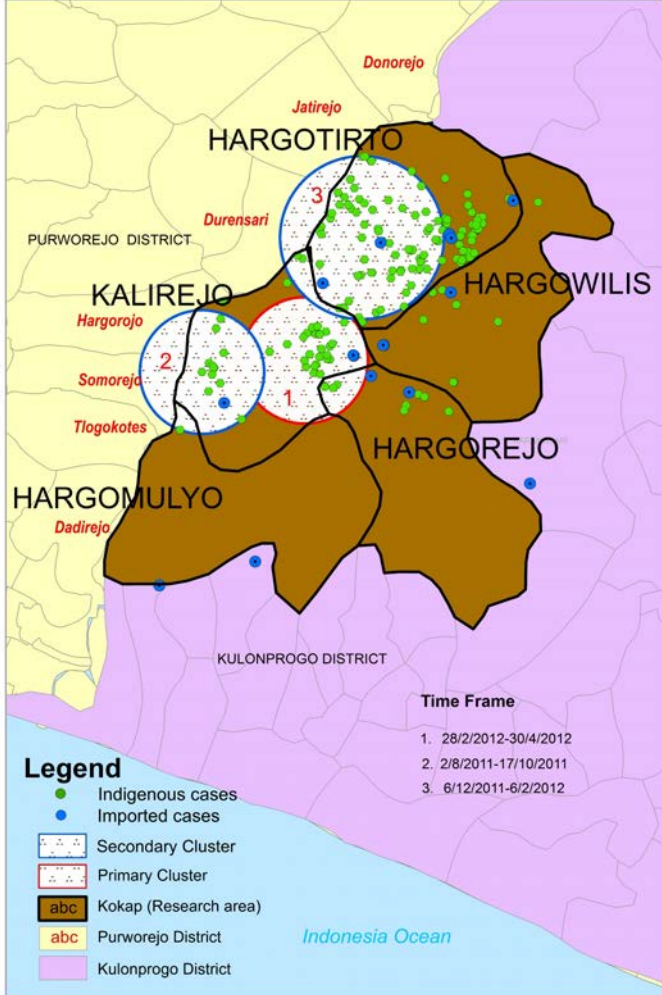

Donorejo

Jatirejo

HARGOTIRTO

Durensari

PURWOREJO DISTRICT

KALIREJO

Hargorojo

HARGOWILIS

Somorejo

2

1

Tlogokotes

HARGOREJO

HARGOMULYO

Dadirejo

KULONPROGO DISTRICT

**Time Frame**

- 1. 28/2/2012-30/4/2012
- 2. 2/8/2011-17/10/2011
- 3. 6/12/2011-6/2/2012

**Legend**

- Indigenous cases
- Imported cases
- ⋯ Secondary Cluster
- ⋯ Primary Cluster
- abc Kokap (Research area)
- abc Purworejo District
- abc Kulonprogo District

Indonesia Ocean
